# Supplementary material for: Socioeconomic position and early adolescent smoking development: evidence from the British Youth Panel Survey (1994–2008)
Source: HighWire-hosted journal article supplement (doi:10.1136/tobaccocontrol-2014-051630), 2014-11-07

Supplementary Figure 1: Predicted Probabilities of Smoking Transitions by Parental Education and Year (Females)

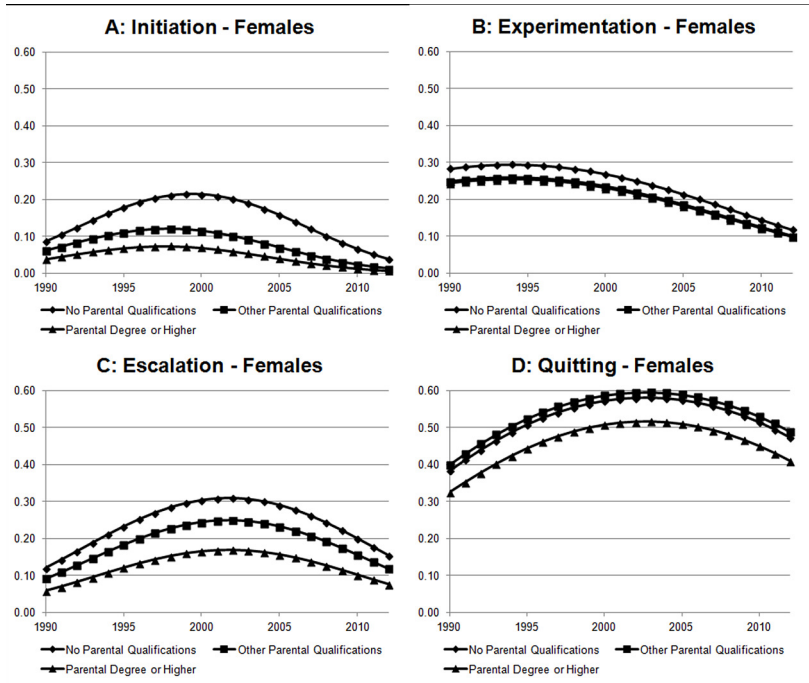

Supplement: tobaccocontrol-2014-051630supp_figures.pdf [file tobaccocontrol-2014-051630supp_figures.pdf]
